## Impact of a predefined pacemapping protocol for ablation of infrequent premature ventricular complexes: a prospective, multicenter study

Jauregui B.<sup>1</sup>; Penela D.<sup>1</sup>; Fernandez-Armenta J.<sup>2</sup>; Acosta J.<sup>3</sup>; Teres C.<sup>1</sup>; Ordonez A.<sup>1</sup>; Soto-Iglesias D.<sup>1</sup>; Silva E.<sup>2</sup>; Chauca A.<sup>1</sup>; Carreno JM.<sup>1</sup>; Scherer C.<sup>1</sup>; Pedrote A.<sup>3</sup>; Berruezo A.<sup>1</sup>

<sup>1</sup>Teknon Medical Centre, Heart Institute, Barcelona, Spain

<sup>2</sup>UNIVERSITY HOSPITAL PUERTA DEL MAR, Cadiz, Spain

<sup>3</sup>University Hospital of Virgen del Rocio, Seville, Spain

**Funding Acknowledgements:** Type of funding sources: None.

**Background:** Pacemapping (PM) is a useful maneuver for aiding PVC ablation procedures, but its stand-alone clinical value when activation mapping is precluded is still to be defined.

**Objectives:** To analyze the clinical efficacy of a predefined PM protocol to be applied during low-burden premature ventricular complex (PVC) ablation procedures, regardless of their site of origin (SOO) and the presence of prior structural heart disease (SHD).

**Methods:** Prospective, non-randomized, multicenter study including 185 consecutive patients referred for a first PVC ablation. A predefined PM protocol was performed to guide ablation whenever a burden < 1 PVC/min was found after a 15-min waiting period, which precluded activation mapping. PM was performed using the PASO module of CARTO3 navigation system, obtaining a correlation grading, color-coded map. A minimum correlation of 94% was required for classifying an area as the PVC-SOO. After identifying the SOO, a high-density PM map with a fill threshold set to 6 was performed and ablation was delivered to the 'target area', defined as the area delimited by the 3 best matching points above the minimum correlation of 94%. Three RF applications were systematically applied in the target area with appropriate parameters: 40 W for the RVOT and aortic root, 50 W for the subvalvular LVOT, 20-30 W in the distal coronary sinus, at operator's discretion in other locations. Clinical success was defined as a PVC-burden reduction of  $\geq 80\%$  in the 24-h Holter after 6 months.

**Results:** 105/185 patients (57%) could undergo activation mapping, while 60/185 (32%) had to be PM-guided. Only 20 patients (11%) had to be canceled due to complete absence of PVCs. Baseline QRS, PVC burden and an OT origin were independent predictors of the need to undergo a PM-guided ablation. The most frequent SOO locations were RVOT (44%), LV (23%), and LVOT (16%), with a significantly higher proportion of RVOT-SOO in the PM group (52% vs. 40%,  $p = 0.03$ ). The mean target area was  $0.6 \pm 0.9$  cm<sup>2</sup>, with a mean smallest PM correlation within that area of  $95 \pm 4\%$ . The mean 10-ms isochronal area in LAT-guided procedures was significantly higher than the PM target area ( $1.7 \pm 2.3$  cm<sup>2</sup>;  $p < 0.001$ ). The mean number of PM matching points acquired was  $39 \pm 21$  (range 6 – 98). Mean mapping ( $29 \pm 22$  min) and RF ( $135 \pm 124$  sec) times were similar both for LAT and PM-guided procedures, with significantly shorter procedure times in the PM group ( $53 \pm 24$  vs.  $61 \pm 26$  min;  $p = 0.04$ ). Clinical success after a 6-month follow-up reached 87% for the PM approach, similar to that of LAT mapping-based ablation procedures (90%;  $p = 0.58$ ).

**Conclusions:** When LAT mapping is precluded by a very low PVC burden in unselected patients referred for PVC ablation procedures, a first-line, stepwise PM and ablation protocol directed to a target area with > 94% matching correlation is a feasible alternative, reaching comparable clinical results regardless of the PVC-SOO and the presence of SHD.

Abstract Figure. Example of a predefined PM protocol

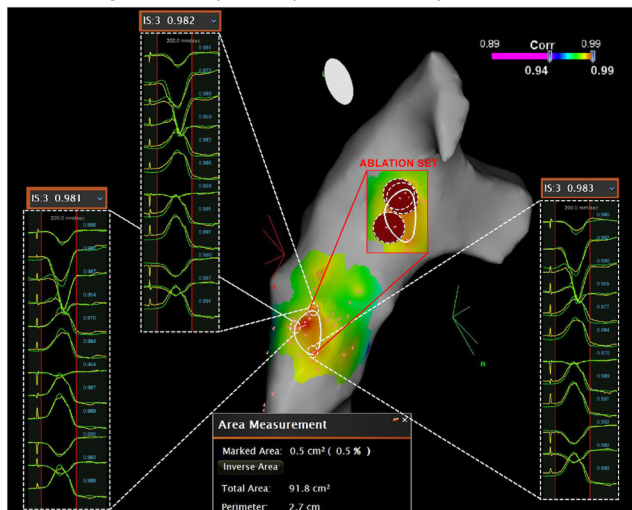

Source: http://academic.oup.com/europace/article-pdf/23/Supplement_3/euab116.360/38131831/euab116.360.pdf
